# Supplementary material for: The RhoGAP SPIN6 Associates with SPL11 and OsRac1 and Negatively Regulates Programmed Cell Death and Innate Immunity in Rice
Source: PubMed Central journal article supplement (PMC4450066; doi:10.1371/journal.ppat.1004629), 2015-02-06
Supplement: ppat.1004629.s002.pdf [file ppat.1004629.s002.pdf]

**Table S1.** The cDNA sequence identity of *Spin6* and its two rice homologous genes

|            | Os07g46450<br>(Spin6) | Os03g24180<br>(Spin6.2) | Os03g11140<br>(Spin6.3) |
|------------|-----------------------|-------------------------|-------------------------|
| Os07g46450 | 100                   |                         |                         |
| Os03g24180 | 81.7                  | 100                     |                         |
| Os03g11140 | 61.4                  | 61.7                    | 100                     |

**Table S2.** The protein sequence identity of SPIN6 and its two rice homologous genes

|            | Os07g46450 | Os03g24180 | Os03g11140 |
|------------|------------|------------|------------|
| Os07g46450 | 100        |            |            |
| Os03g24180 | 79.9       | 100        |            |
| Os03g11140 | 40.7       | 40.8       | 100        |

**Table S3.** Primers used in this study

| <b>Gene</b>      | <b>Primer name</b> | <b>Primer sequence</b>                  | <b>Objects</b>                          |
|------------------|--------------------|-----------------------------------------|-----------------------------------------|
| <i>SPIN6</i>     | SPIN6URiF          | <u>CACCGATATTGATGGCAGCCCTTCTTT</u><br>C | <i>SPIN6</i> UTR RNAi constructs making |
|                  | SPIN6URiR          | ATTCGATTCTCAGCAGTATG                    |                                         |
|                  | SPIN6FL F          | ATGGCTGCGGCGACGGCG                      | <i>SPIN6</i> full length cloning        |
|                  | SPIN6FL R          | CTACCTTGGACTGTTCCAAG                    |                                         |
|                  | SPIN6NT F          | CGGAGCGGCAGCAGCAACAGC                   | <i>SPIN6</i> N-terminal cloning         |
|                  | SPIN6NT R          | TGACTCTTCACTTCCGCTATCTTCA               |                                         |
|                  | SPIN6CT F          | CAAATTGAAGATAGCGGAAGTGA                 | <i>SPIN6</i> C-terminal cloning         |
|                  | SPIN6CT R          | ATGACGAAGACTTGTATGG                     |                                         |
|                  | SPIN6PH F          | CGGAGCGGCAGCAGCAACAGC                   | <i>SPIN6</i> PH domain cloning          |
|                  | SPIN6PH R          | AATCGGCCTACCAACAACCAATGA                |                                         |
|                  | SPIN6GAP F         | GTTGTTGGTAGGCCGATTCTTCTT                | <i>SPIN6</i> GAP domain cloning         |
|                  | SPIN6GAP R         | TGACTCTTCACTTCCGCTATCTTCA               |                                         |
|                  | SPIN6QF            | GGAAGAAGCTCTTGCACAGG                    | <i>SPIN6</i> Q RT-PCR                   |
|                  | SPIN6QR            | CTCTTCTCTCGCCAGTTTGG                    |                                         |
| <i>SPL11</i>     | SPL11FLF           | ATGAAAAAGTTTCAGGGAGT                    | <i>SPL11</i> full length cloning        |
|                  | SPL11FLR           | TCATAACAACCATAGGGTATTG                  |                                         |
|                  | SPL11ARM F         | CCAGACACTGAGGAGCAGAG                    | <i>SPL11</i> ARM domain cloning         |
|                  | SPL11 ARM R        | CTCTTGTTGCTGGACTAGGAA                   |                                         |
|                  | SPL11QF            | ATTCCTGACGAGTTCCGATG                    | <i>SPL11</i> Q RT-PCR                   |
|                  | SPL11QR            | CATCTTCTGTTGCGTGTTG                     |                                         |
| <i>OsRac1</i>    | OsRac1FL F         | ATGAGCTCGGCGGCGGCGGCGACGA               | <i>OsRac1</i> full length cloning       |
|                  | OsRac1FL R         | CTACGCGAAACAAGCGCTTCCGC                 |                                         |
|                  | OsRac1 QF          | GCCCCATGGATCTACTCAGA                    | <i>OsRac1</i> Q RT-PCR                  |
|                  | OsRac1 QR          | AAAGGAGCTCCACTGCAGAA                    |                                         |
| <i>Ubiquitin</i> | UBQQF              | AACCAGCTGAGGCCCAAGA                     | <i>Ubiquitin</i> Q RT-PCR               |
|                  | UBQQR              | ACGATTGATTAAACCAGTCCATGA                |                                         |
| <i>PBZ1</i>      | PBZ1QF             | CCCTGCCGAATACGCCTAA                     | <i>PBZ1</i> Q RT-PCR                    |
|                  | PBZ1QR             | CTCAAACGCCACGAGAATTTG                   |                                         |
| <i>PR1a</i>      | PR1aQF             | CGTCTTCATCACCTGCAACTACTC                | <i>PR1a</i> Q RT-PCR                    |

|                |            |                           |                         |
|----------------|------------|---------------------------|-------------------------|
|                | PR1aQR     | CATGCATAAACACGCTAGCATAGCA |                         |
| <i>PAL</i>     | PALQF      | CTACAACAACGGGCTGACCT      | <i>PAL</i> Q RT-PCR     |
|                | PALQR      | TCTGGACATGGTTGGTGATG      |                         |
| <i>OsSGT1</i>  | OsSGT1 QF  | TTCGCATCTGGTGACTCAAG      | <i>OsSGT1</i> Q RT-PCR  |
|                | OsSGT1 QR  | TGCTCCATCTTCAGCCTTCT      |                         |
| <i>OsRAR1</i>  | OsRAR1 QF  | GTTGAGAAGCCTGCAGTTCC      | <i>OsRAR1</i> Q RT-PCR  |
|                | OsRAR1 QR  | CAGGTCCTGGATGGTAATCG      |                         |
| <i>OsRbohB</i> | OsRbohB QF | GTTCTACTGTGGTGAGCCTGT     | <i>OsRbohB</i> Q RT-PCR |
|                | OsRbohB QR | CATACACGGGTATTTCTCAA      |                         |
| <i>OsNAC4</i>  | PALQF      | TCCTGCCACCATTCTGAGATG     | <i>OsNAC4</i> Q RT-PCR  |
|                | PALQR      | TTGCAGAATCATGCTTGCCAG     |                         |
| <i>OsPR5</i>   | OsPR5 QF   | CAACAGCAACTACCAAGTCGTCTT  | <i>OsPR5</i> Q RT-PCR   |
|                | OsPR5 QR   | CAAGGTGTCGTTTTATTCATCAAC  |                         |
